# Supplementary material
Source: bioRxiv or medRxiv preprint supplement (https://www.biorxiv.org/highwire/filestream/130491/field_highwire_adjunct_files/8/434654-6.pdf)
Supplement: Supplementary file [file 434654-6.pdf]

1 **Table S5.** Effects of warming and precipitation treatments (fixed effects) on (log  
2 transformed) AMB in the summer and the fall, using a mixed-effects model that included the  
3 fixed effect of time and the random effect of blocks. P values for Type III sum of squares  
4 with a Satterthwaite approximation for the degrees of freedom. Significance codes: P < 0.001  
5 '\*\*\*', 0.05 < P < 0.1 '†'.

6

|                      | Sum. Sq. | Mean Sq. | num df | den df | F      | P          |
|----------------------|----------|----------|--------|--------|--------|------------|
| <b>Precip</b>        | 0.001    | 0.0005   | 2      | 55.926 | 1.606  | 0.210      |
| <b>Temp</b>          | 0.003    | 0.0008   | 3      | 55.926 | 2.723  | 0.053 †    |
| <b>Season</b>        | 0.004    | 0.0038   | 1      | 58.336 | 12.404 | < 0.001*** |
| <b>Precip:Temp</b>   | 0.003    | 0.0006   | 6      | 55.934 | 1.814  | 0.113      |
| <b>Precip:Season</b> | 0.001    | 0.0007   | 2      | 55.926 | 2.361  | 0.104      |
| <b>Temp:Season</b>   | 0.0003   | 0.0001   | 3      | 55.926 | 0.425  | 0.736      |

7
